# Supplementary material
Source: Springer Nature journal article supplement (https://www.springermedizin.de/resource/supplementary/12913_2013_3399_MOESM5_ESM.pdf/9532706)
Supplement: MOESM5 [file 9532706]

| Experiencing                      | Doing                               | Belonging/Becoming             | Factors Affecting the CoHP            |
|-----------------------------------|-------------------------------------|--------------------------------|---------------------------------------|
| Normalisation of care             | Developing Coping strategies        | Information Sharing            | Service Transition                    |
| Normalisation of illness          | Importance of efficacy in care      | Negotiating with NHS Staff     | Poor Parent Social Life               |
| Patient Strength Inspires Parents | Fear of Health Failing              | Praising NHS Staff             | Psycho social effects on family       |
| Acceptance and Action             | Negotiation over division of labour | Challenging School Perceptions | Family chronic illness                |
| Building Relationships            |                                     | Expertise in care              | Difficulty in learning new procedures |
|                                   |                                     |                                | Shielding/Avoidance                   |
|                                   |                                     |                                | Language/cultural barriers            |

Source: Authors interpretation of Primary Research data (2013) using Wenger's Communities of Practice methodology. Adapted from Wenger 1998
